# Supplementary material
Source: PubMed Central journal article supplement (PMC4054430)
Supplement: JVI.03170-13_zjv999099217so1.pdf [file JVI.03170-13_zjv999099217so1.pdf]

**Supplemental Table S1. List of 404 Kinases Analyzed by AlphaScreen**

| #  | Kinases | Value | #  | Kinases | Value | #   | Kinases  | Value | #   | Kinases | Value |
|----|---------|-------|----|---------|-------|-----|----------|-------|-----|---------|-------|
| 1  | PIM1    | 24020 | 36 | MLKL    | 2880  | 71  | DCAMKL1  | 1674  | 106 | CDKL2   | 1184  |
| 2  | LYN     | 22342 | 37 | CK1g2   | 2602  | 72  | MAPKAPK2 | 1668  | 107 | CDK5    | 1180  |
| 3  | ULK4    | 21784 | 38 | CDKL3   | 2584  | 73  | JAK3     | 1664  | 108 | YANK2   | 1172  |
| 4  | Fused   | 18910 | 39 | CK1g1   | 2560  | 74  | PAK1     | 1652  | 109 | STLK6   | 1162  |
| 5  | TGFbR1  | 15634 | 40 | SgK495  | 2558  | 75  | CK1d     | 1608  | 110 | AMPKa2  | 1148  |
| 6  | MLK1    | 12242 | 41 | CK2a1   | 2534  | 76  | FGR      | 1602  | 111 | MNK2    | 1144  |
| 7  | smMLCK  | 10084 | 42 | PRPK    | 2528  | 77  | CaMKK2   | 1578  | 112 | TYRO3   | 1140  |
| 8  | PDHK2   | 8868  | 43 | GSK3B   | 2410  | 78  | SYK      | 1576  | 113 | RIOK2   | 1116  |
| 9  | TSSK2   | 8310  | 44 | PITSLRE | 2304  | 79  | LOK      | 1554  | 114 | MST3    | 1114  |
| 10 | HCK     | 8250  | 45 | ULK3    | 2262  | 80  | SgK223   | 1548  | 115 | PKD2    | 1080  |
| 11 | PIM2    | 7340  | 46 | MAP2K2  | 2254  | 81  | TSSK4    | 1546  | 116 | MASTL   | 1066  |
| 12 | DYRK3   | 5116  | 47 | CK1g3   | 2218  | 82  | SGK2     | 1530  | 117 | MYO3A   | 1058  |
| 13 | CK2a2   | 5068  | 48 | ULK2    | 2212  | 83  | SRPK1    | 1526  | 118 | CASK    | 1056  |
| 14 | JNK1    | 5048  | 49 | MAP2K6  | 2112  | 84  | RSK2     | 1496  | 119 | RIPK1   | 1054  |
| 15 | NEK7    | 5006  | 50 | OSR1    | 2108  | 85  | MNK1     | 1458  | 120 | LATS2   | 1044  |
| 16 | FGFR2   | 4930  | 51 | NRBP1   | 2076  | 86  | BMPR1A   | 1444  | 121 | ILK     | 1040  |
| 17 | TLK2    | 4716  | 52 | LIMK2   | 2036  | 87  | PINK1    | 1440  | 122 | TIF1a   | 1038  |
| 18 | Wee1B   | 4606  | 53 | CHED    | 2018  | 88  | Slob     | 1418  | 123 | PKCa    | 1032  |
| 19 | RSKL2   | 4552  | 54 | CK1e    | 2012  | 89  | SGK3     | 1400  | 124 | DAPK1   | 1026  |
| 20 | ROCK1   | 4502  | 55 | RNAseL  | 1934  | 90  | MAP2K1   | 1386  | 125 | HIPK2   | 1022  |
| 21 | HUNK    | 4448  | 56 | FRAP    | 1932  | 91  | FAK      | 1364  | 126 | JAK1    | 1014  |
| 22 | PKG2    | 4206  | 57 | FER     | 1862  | 92  | MAP3K2   | 1358  | 127 | CaMK2g  | 992   |
| 23 | FES     | 3900  | 58 | PKACb   | 1854  | 93  | CK1a     | 1354  | 128 | JNK2    | 972   |
| 24 | SGK     | 3782  | 59 | DDR1    | 1846  | 94  | ADCK1    | 1344  | 129 | TIE1    | 966   |
| 25 | HIPK1   | 3638  | 60 | CaMK2b  | 1828  | 95  | CDK8     | 1302  | 130 | PKD3    | 954   |
| 26 | MELK    | 3600  | 61 | p70S6K  | 1824  | 96  | ZC1/HGK  | 1262  | 131 | Erk2    | 932   |
| 27 | MARK3   | 3414  | 62 | CaMK1a  | 1772  | 97  | NIM1     | 1252  | 132 | NIK     | 924   |
| 28 | RET     | 3380  | 63 | RSK1    | 1758  | 98  | PHKg1    | 1248  | 133 | NEK11   | 920   |
| 29 | ADCK3   | 3380  | 64 | Erk3    | 1744  | 99  | PDGFRb   | 1244  | 134 | Trb1    | 916   |
| 30 | VRK1    | 3348  | 65 | SCYL2   | 1740  | 100 | ALK2     | 1238  | 135 | MAP3K4  | 914   |
| 31 | TAK1    | 3304  | 66 | RIPK2   | 1692  | 101 | MYT1     | 1236  | 136 | KHS2    | 914   |
| 32 | PLK1    | 3230  | 67 | BUB1    | 1692  | 102 | PKCd     | 1218  | 137 | PDGFRa  | 912   |
| 33 | PKN2    | 3152  | 68 | p38a    | 1684  | 103 | CLIK1    | 1218  | 138 | NEK6    | 904   |
| 34 | KIS     | 3126  | 69 | skMLCK  | 1678  | 104 | Trad     | 1204  | 139 | FLT1    | 902   |
| 35 | AurB    | 3102  | 70 | ARAF    | 1676  | 105 | AKT2     | 1198  | 140 | AKT1    | 898   |

**Supplemental Table S1. List of 404 Kinases Analyzed by AlphaScreen**

| #   | Kinases    | Value | #   | Kinases    | Value | #   | Kinases  | Value | #   | Kinases | Value |
|-----|------------|-------|-----|------------|-------|-----|----------|-------|-----|---------|-------|
| 141 | BRD2       | 886   | 176 | TESK1      | 740   | 211 | SPEG     | 610   | 246 | SRPK2   | 532   |
| 142 | MOK        | 874   | 177 | CSK        | 740   | 212 | CaMK2d   | 610   | 247 | PKCh    | 530   |
| 143 | ROR2       | 870   | 178 | SgK288     | 726   | 213 | YES      | 608   | 248 | IRR     | 530   |
| 144 | GCN2       | 864   | 179 | FLT3       | 710   | 214 | PCTAIRE2 | 606   | 249 | IRAK2   | 530   |
| 145 | SCYL3      | 858   | 180 | CDK3       | 710   | 215 | LCK      | 600   | 250 | TXK     | 528   |
| 146 | CDKL1      | 854   | 181 | IKKe       | 706   | 216 | EphA7    | 598   | 251 | AlphaK3 | 526   |
| 147 | SRC        | 840   | 182 | CDK4       | 706   | 217 | CDK2     | 598   | 252 | BARK2   | 516   |
| 148 | DYRK1B     | 836   | 183 | PDHK3      | 704   | 218 | GPRK4    | 596   | 253 | JAK2    | 510   |
| 149 | CaMK1g     | 834   | 184 | PIK3R4     | 702   | 219 | PKCb     | 594   | 254 | p38b    | 508   |
| 150 | PAK2       | 822   | 185 | TRKB       | 700   | 220 | BLK      | 594   | 255 | FYN     | 508   |
| 151 | PKR        | 812   | 186 | CDK10      | 700   | 221 | STLK5    | 590   | 256 | NEK1    | 506   |
| 152 | PDHK4      | 812   | 187 | IRAK3      | 696   | 222 | TIF1b    | 584   | 257 | NDR1    | 506   |
| 153 | caMLCK     | 812   | 188 | CLK4       | 694   | 223 | LRRK2    | 584   | 258 | PHKg2   | 500   |
| 154 | IRAK1      | 806   | 189 | MAK        | 690   | 224 | DAPK3    | 584   | 259 | CLK2    | 500   |
| 155 | CTK        | 806   | 190 | BMPR1B     | 690   | 225 | VRK3     | 582   | 260 | DDR2    | 498   |
| 156 | JNK3       | 802   | 191 | MUSK       | 688   | 226 | TSSK1    | 576   | 261 | TNK1    | 496   |
| 157 | RYK        | 798   | 192 | KDR        | 688   | 227 | CRIK     | 576   | 262 | p70S6Kb | 496   |
| 158 | HER4/ErbB4 | 794   | 193 | PKCe       | 678   | 228 | ULK1     | 572   | 263 | TAO3    | 494   |
| 159 | MST2       | 788   | 194 | BARK1      | 678   | 229 | TESK2    | 572   | 264 | MLK2    | 494   |
| 160 | MAP3K3     | 788   | 195 | SgK196     | 668   | 230 | PKN1     | 572   | 265 | NEK5    | 492   |
| 161 | DYRK1A     | 784   | 196 | ACTR2      | 664   | 231 | PKCg     | 570   | 266 | CCRK    | 492   |
| 162 | eEF2K      | 778   | 197 | PRKX       | 658   | 232 | EphA3    | 570   | 267 | CaMKK1  | 490   |
| 163 | CHK1       | 774   | 198 | p38g       | 658   | 233 | ALK4     | 564   | 268 | BMX     | 484   |
| 164 | DAPK2      | 772   | 199 | MSK2       | 652   | 234 | A6r      | 564   | 269 | PAK5    | 474   |
| 165 | RIPK3      | 770   | 200 | INSR       | 652   | 235 | EphA1    | 562   | 270 | TTBK1   | 470   |
| 166 | DCAMKL3    | 766   | 201 | MAPKAPK5   | 644   | 236 | EphB4    | 558   | 271 | Trb3    | 470   |
| 167 | SgK269     | 762   | 202 | TBCK       | 642   | 237 | ZAP70    | 556   | 272 | G11     | 466   |
| 168 | CDKL5      | 762   | 203 | HER3/ErbB3 | 640   | 238 | H11      | 552   | 273 | IKKb    | 464   |
| 169 | TYK2       | 760   | 204 | TTK        | 638   | 239 | GPRK5    | 548   | 274 | CaMK2a  | 464   |
| 170 | NuaK2      | 760   | 205 | TAO2       | 638   | 240 | COT      | 546   | 275 | Trb2    | 462   |
| 171 | IKKa       | 758   | 206 | STK33      | 628   | 241 | NDR2     | 542   | 276 | EphA4   | 462   |
| 172 | RSK4       | 756   | 207 | SNRK       | 622   | 242 | DRAK1    | 542   | 277 | DYRK2   | 460   |
| 173 | DNAPK      | 750   | 208 | MST1       | 620   | 243 | HRI      | 538   | 278 | TRKA    | 458   |
| 174 | YSK1       | 748   | 209 | TRKC       | 614   | 244 | MAPKAPK3 | 536   | 279 | FGFR1   | 458   |
| 175 | RSK3       | 742   | 210 | FRK        | 612   | 245 | AurC     | 534   | 280 | MAP3K6  | 456   |

**Supplemental Table S1. List of 404 Kinases Analyzed by AlphaScreen**

| #   | Kinases    | Value | #   | Kinases  | Value | #   | Kinases  | Value | #   | Kinases  | Value |
|-----|------------|-------|-----|----------|-------|-----|----------|-------|-----|----------|-------|
| 281 | SgK496     | 454   | 312 | ANKRD3   | 396   | 343 | PIM3     | 352   | 374 | DCAMKL2  | 284   |
| 282 | KSR1       | 454   | 313 | BCKDK    | 394   | 344 | ITK      | 352   | 375 | GCK      | 282   |
| 283 | CLK1       | 454   | 314 | CDK6     | 392   | 345 | CDK11    | 350   | 376 | PRP4     | 280   |
| 284 | IRE2       | 452   | 315 | ADCK4    | 390   | 346 | CDC2     | 348   | 377 | MLK4     | 274   |
| 285 | TSSK3      | 446   | 316 | TBK1     | 388   | 347 | ABL      | 346   | 378 | GPRK6    | 274   |
| 286 | CYGD       | 438   | 317 | CaMK1b   | 388   | 348 | PAK6     | 344   | 379 | DLK      | 272   |
| 287 | PKCt       | 436   | 318 | SuRTK106 | 386   | 349 | MARK1    | 344   | 380 | PSKH1    | 270   |
| 288 | PCTAIRE3   | 432   | 319 | PKG1     | 386   | 350 | FGFR3    | 342   | 381 | NEK2     | 268   |
| 289 | AlphaK1    | 432   | 320 | PFTAIRE1 | 386   | 351 | BUBR1    | 342   | 382 | AXL      | 268   |
| 290 | EphB1      | 430   | 321 | NEK8     | 386   | 352 | p38d     | 340   | 383 | CDK9     | 266   |
| 291 | MET        | 428   | 322 | ROR1     | 382   | 353 | MST4     | 338   | 384 | Erk4     | 264   |
| 292 | IRE1       | 428   | 323 | LMR1     | 382   | 354 | CaMK4    | 336   | 385 | PYK2     | 262   |
| 293 | MARK2      | 424   | 324 | GAK      | 382   | 355 | AMPKa1   | 334   | 386 | ALK7     | 260   |
| 294 | CCK4       | 424   | 325 | SCYL1    | 380   | 356 | NEK4     | 332   | 387 | PDK1     | 256   |
| 295 | ZAK        | 422   | 326 | MAP3K7   | 378   | 357 | BRK      | 332   | 388 | PASK     | 256   |
| 296 | HER2/ErbB2 | 420   | 327 | IGF1R    | 372   | 358 | EphA6    | 330   | 389 | EphA2    | 256   |
| 297 | EphB6      | 420   | 328 | AurA     | 370   | 359 | TIE2     | 324   | 390 | MAST2    | 254   |
| 298 | BIKE       | 420   | 329 | SSTK     | 368   | 360 | PAK3     | 324   | 391 | MPSK1    | 252   |
| 299 | FASTK      | 418   | 330 | RSKL1    | 368   | 361 | MARK4    | 324   | 392 | CDK7     | 252   |
| 300 | BRD3       | 416   | 331 | GSK3A    | 366   | 362 | PCTAIRE1 | 320   | 393 | SIK      | 250   |
| 301 | LIMK1      | 414   | 332 | MAP2K5   | 364   | 363 | MAP2K3   | 320   | 394 | DRAK2    | 250   |
| 302 | HIPK3      | 414   | 333 | FMS      | 364   | 364 | EphA5    | 320   | 395 | YANK3    | 244   |
| 303 | VRK2       | 408   | 334 | MAST4    | 362   | 365 | PKCz     | 318   | 396 | PAK4     | 244   |
| 304 | HSER       | 408   | 335 | FGFR4    | 362   | 366 | TEC      | 312   | 397 | KHS1     | 244   |
| 305 | QIK        | 406   | 336 | EphB3    | 360   | 367 | A6       | 310   | 398 | ZC2/TNIK | 240   |
| 306 | CaMK1d     | 406   | 337 | TLK1     | 358   | 368 | RIOK3    | 304   | 399 | RIOK1    | 240   |
| 307 | RON        | 404   | 338 | CHK2     | 358   | 369 | STLK3    | 298   | 400 | MAP2K7   | 240   |
| 308 | FLT4       | 402   | 339 | ACTR2B   | 358   | 370 | Erk5     | 296   | 401 | PFTAIRE2 | 236   |
| 309 | CLK3       | 402   | 340 | PEK      | 356   | 371 | PKCi     | 290   | 402 | MYO3B    | 224   |
| 310 | RAF1       | 400   | 341 | PDHK1    | 356   | 372 | PBK      | 284   | 403 | MAP2K4   | 218   |
| 311 | ICK        | 398   | 342 | TGFbR2   | 352   | 373 | IRAK4    | 284   | 404 | KIT      | 216   |

**Footnotes.**

- Kinases are sorted in descending order (largest value first) according to AlphaScreen values.
- Data shown are mean values of duplicate experiments.

**Supplemental Table S2.**

**Serine/Threonine Kinases Analyzed by *In Vitro* Phosphorylation Assay**

| Kinases         | Relative Kinase Activity |      |       | Kinases         | Relative Kinase Activity |      |        |
|-----------------|--------------------------|------|-------|-----------------|--------------------------|------|--------|
|                 | LU                       | FL   | D3    |                 | LU                       | FL   | D3     |
| PIM1            | 24020                    | 1.77 | 4.06  | CKI- $\gamma$ 1 | 2560                     | n/a* | 138.69 |
| ULK4            | 21784                    | 1.02 | 0.79  | PRPK            | 2528                     | 1.57 | 3.04   |
| Fused           | 18910                    | 0.84 | 0.92  | GSK3B           | 2410                     | 1.53 | 1.58   |
| TGF $\beta$ R1  | 15634                    | 1.10 | 2.12  | PITSLRE         | 2304                     | 2.26 | 2.94   |
| MLK1            | 12242                    | 2.69 | 0.64  | CKI- $\gamma$ 3 | 2218                     | 0.23 | 52.51  |
| smMLCK          | 10084                    | 1.41 | 0.92  | MAP2K6          | 2112                     | n/a  | 0.14   |
| PDHK2           | 8868                     | 0.91 | 2.54  | NRBP1           | 2076                     | n/a  | 0.97   |
| TSSK2           | 8310                     | 4.24 | 14.94 | LIMK2           | 2036                     | 0.80 | 0.47   |
| PIM2            | 7340                     | 0.95 | 1.00  | CHED            | 2018                     | n/a  | 1.50   |
| DYRK3           | 5116                     | 1.62 | 0.99  | CKI- $\epsilon$ | 2012                     | 7.95 | 9.48   |
| CKII- $\alpha'$ | 5068                     | 2.30 | 8.20  | RNaseL          | 1934                     | n/a  | 1.15   |
| JNK1            | 5048                     | 0.64 | 1.95  | FRAP            | 1932                     | n/a  | 1.30   |
| NEK7            | 5006                     | 1.69 | 1.52  | PKAC $\beta$    | 1854                     | 0.15 | 69.54  |
| TLK2            | 4716                     | 1.27 | 0.96  | CaMK2 $\beta$   | 1828                     | 1.53 | 0.97   |
| Wee1B           | 4606                     | 1.27 | 2.62  | RSK1            | 1758                     | 0.78 | 0.55   |
| RSKL2           | 4552                     | n/a  | 1.27  | Erk3            | 1744                     | n/a  | 1.63   |
| ROCK1           | 4502                     | n/a* | 1.26  | BUB1            | 1692                     | 1.02 | 0.95   |
| HUNK            | 4448                     | 1.67 | 1.00  | p38 $\alpha$    | 1684                     | n/a  | 1.01   |
| PKG2            | 4206                     | 0.22 | 2.44  | skMLCK          | 1678                     | n/a  | 1.45   |
| SGK             | 3782                     | 2.28 | 1.19  | DCAMKL1         | 1674                     | n/a  | 5.55   |
| MARK3           | 3414                     | n/a  | 4.48  | MAPKAPK2        | 1668                     | 1.39 | 1.63   |
| ADCK3           | 3380                     | n/a  | 1.49  | CaMKK2          | 1578                     | n/a  | 3.49   |
| VRK1            | 3348                     | 2.41 | 1.75  | SGK2            | 1530                     | n/a  | 1.26   |
| Plk1            | 3230                     | 2.70 | 44.65 | MNK1            | 1458                     | 1.69 | 2.84   |
| PKN2            | 3152                     | 0.80 | 1.99  | Slob            | 1418                     | n/a  | 0.63   |
| KIS             | 3126                     | 3.36 | 1.11  | MAP3K2          | 1358                     | n/a  | 1.22   |
| CKI- $\gamma$ 2 | 2602                     | 4.31 | 3.15  | CKI- $\alpha$   | 1354                     | 4.66 | 1.00   |
| CDKL3           | 2584                     | 0.98 | 3.09  |                 |                          |      |        |

**Footnotes.** LU: light unit in AlphaScreen; FL: full-length NS5A; D3: domain III of NS5A; n/a: not assessed due to low amounts of full-length NS5A; n/a\*: not assessed due to overlap between purified kinases and NS5A on the gel; Relative Kinase Activity: fold increase of the *in vitro* kinase activity of each kinase relative to that of DHFR.

Supplemental Table S3. NS5A Peptides Identified by LC-MS/MS

| m/z    | Mass   | Charge State | Peptide Score | Peptide Sequence                 | Location in NS5A (aa) | Modification (Residue) | Knockdown | No. of Peptide |
|--------|--------|--------------|---------------|----------------------------------|-----------------------|------------------------|-----------|----------------|
| 1196.5 | 3586.6 | 3            | 25.1          | ATCTTHSNTYDVMVDANLLMEGGVAGTEPESR | 241 - 273             | Oxidation (M)          | Ctrl      | 1              |
| 1182.6 | 2363.2 | 2            | 31.5          | LARGSPPEASSSVSLSAPSLR            | 218 - 240             | Phosphorylation (S/T)  | Ctrl      | 1              |
| 1182.6 | 2363.2 | 2            | 27.6          | LARGSPPEASSSVSLSAPSLR            | 218 - 240             | Phosphorylation (S/T)  | CKI-α     | 1              |
| 1119.6 | 2237.1 | 2            | 27.3          | ALPAWARPDYNPPLVESWR              | 308 - 326             |                        | Ctrl      | 1              |
| 1072.6 | 2143.2 | 2            | 63.4          | RTVGLSESTISEALQQLAIK             | 355 - 374             |                        | Ctrl      | 5              |
| 1072.6 | 2143.2 | 2            | 99.2          | RTVGLSESTISEALQQLAIK             | 355 - 374             |                        | CKI-α     | 3              |
| 1052.5 | 2102.9 | 2            | 25.0          | GSPPEASSSVSLSAPSLR               | 221 - 240             | Phosphorylation (S/T)  | Ctrl      | 1              |
| 1034.5 | 2067.0 | 2            | 34.0          | TVGLSESTISEALQQLAIK              | 356 - 374             | Phosphorylation (S/T)  | Ctrl      | 1              |
| 1012.5 | 2022.9 | 2            | 99.4          | GSPPEASSSVSLSAPSLR               | 221 - 240             | Phosphorylation (S/T)  | Ctrl      | 8              |
| 1012.5 | 2022.9 | 2            | 96.2          | GSPPEASSSVSLSAPSLR               | 221 - 240             | Phosphorylation (S/T)  | CKI-α     | 13             |
| 1012.5 | 2022.9 | 2            | 72.5          | GSPPEASSSVSLSAPSLR               | 221 - 240             | Phosphorylation (S/T)  | Ctrl      | 2              |
| 1012.5 | 2022.9 | 2            | 70.8          | GSPPEASSSVSLSAPSLR               | 221 - 240             | Phosphorylation (S/T)  | CKI-α     | 2              |
| 994.5  | 1987.1 | 2            | 123.0         | TVGLSESTISEALQQLAIK              | 356 - 374             |                        | Ctrl      | 10             |
| 994.5  | 1987.1 | 2            | 107.0         | TVGLSESTISEALQQLAIK              | 356 - 374             |                        | CKI-α     | 10             |
| 989.5  | 1977.0 | 2            | 65.0          | RPDYQPPTVAGCALPPPK               | 327 - 344             | Propionamide (C)       | CKI-α     | 8              |
| 972.5  | 1943.0 | 2            | 122.3         | GSPPEASSSVSLSAPSLR               | 221 - 240             |                        | Ctrl      | 48             |
| 972.5  | 1943.0 | 2            | 132.3         | GSPPEASSSVSLSAPSLR               | 221 - 240             |                        | CKI-α     | 73             |
| 968.8  | 2903.4 | 3            | 60.7          | VAASEYAEVTQHGSYSYVTLTDDNLK       | 113 - 139             |                        | Ctrl      | 5              |
| 968.8  | 2903.4 | 3            | 70.2          | VAASEYAEVTQHGSYSYVTLTDDNLK       | 113 - 139             |                        | CKI-α     | 12             |
| 954.0  | 1906.0 | 2            | 59.0          | RPDYQPPTVAGCALPPPK               | 327 - 344             |                        | CKI-α     | 8              |
| 863.9  | 1725.8 | 2            | 81.8          | SMLTDPPIHATAAAR                  | 201 - 216             | Oxidation (M)          | Ctrl      | 20             |
| 863.9  | 1725.8 | 2            | 87.0          | SMLTDPPIHATAAAR                  | 201 - 216             | Oxidation (M)          | CKI-α     | 75             |
| 855.9  | 1709.8 | 2            | 86.6          | SMLTDPPIHATAAAR                  | 201 - 216             |                        | Ctrl      | 23             |
| 855.9  | 1709.8 | 2            | 86.4          | SMLTDPPIHATAAAR                  | 201 - 216             |                        | CKI-α     | 17             |
| 842.8  | 2525.3 | 3            | 58.5          | IPCQLPSPEFFSWVDGVQIHR            | 140 - 160             | Propionamide (C)       | Ctrl      | 2              |
| 842.8  | 2525.3 | 3            | 53.9          | IPCQLPSPEFFSWVDGVQIHR            | 140 - 160             | Propionamide (C)       | CKI-α     | 1              |
| 819.1  | 2454.2 | 3            | 68.6          | IPCQLPSPEFFSWVDGVQIHR            | 140 - 160             |                        | Ctrl      | 2              |
| 819.1  | 2454.2 | 3            | 53.2          | IPCQLPSPEFFSWVDGVQIHR            | 140 - 160             |                        | CKI-α     | 1              |
| 799.4  | 1596.8 | 2            | 60.8          | GKGVWAGTGIMTTR                   | 42 - 56               |                        | Ctrl      | 2              |
| 799.4  | 1596.8 | 2            | 72.0          | GKGVWAGTGIMTTR                   | 42 - 56               |                        | CKI-α     | 2              |
| 794.1  | 2379.3 | 3            | 59.0          | RRTVGLSESTISEALQQLAIK            | 354 - 374             | Phosphorylation (S/T)  | CKI-α     | 1              |
| 788.7  | 2363.1 | 3            | 46.0          | LARGSPPEASSSVSLSAPSLR            | 218 - 240             | Phosphorylation (S/T)  | Ctrl      | 3              |
| 788.7  | 2363.1 | 3            | 54.4          | LARGSPPEASSSVSLSAPSLR            | 218 - 240             | Phosphorylation (S/T)  | CKI-α     | 2              |
| 679.0  | 2034.1 | 3            | 75.4          | RPDYQPPTVAGCALPPPK               | 327 - 345             |                        | Ctrl      | 6              |
| 679.0  | 2034.1 | 3            | 83.9          | RPDYQPPTVAGCALPPPK               | 327 - 345             |                        | CKI-α     | 4              |
| 675.3  | 2022.9 | 3            | 36.9          | GSPPEASSSVSLSAPSLR               | 221 - 240             | Phosphorylation (S/T)  | Ctrl      | 1              |
| 675.3  | 2022.9 | 3            | 25.0          | GSPPEASSSVSLSAPSLR               | 221 - 240             | Phosphorylation (S/T)  | Ctrl      | 1              |
| 666.8  | 1331.6 | 2            | 67.7          | CPCGANISGNVR                     | 57 - 68               | Propionamide (C)       | Ctrl      | 2              |
| 666.8  | 1331.6 | 2            | 64.1          | CPCGANISGNVR                     | 57 - 68               | Propionamide (C)       | CKI-α     | 2              |
| 660.0  | 1977.0 | 3            | 74.2          | RPDYQPPTVAGCALPPPK               | 327 - 344             | Propionamide (C)       | Ctrl      | 8              |
| 637.4  | 1272.7 | 2            | 44.4          | LPGLPFISQCK                      | 31 - 41               | Propionamide (C)       | Ctrl      | 4              |
| 637.4  | 1272.7 | 2            | 53.0          | LPGLPFISQCK                      | 31 - 41               | Propionamide (C)       | CKI-α     | 4              |
| 636.3  | 1906.0 | 3            | 68.9          | RPDYQPPTVAGCALPPPK               | 327 - 344             |                        | Ctrl      | 13             |
| 633.3  | 1264.6 | 2            | 66.6          | GWAGTGIMTTR                      | 45 - 56               | Oxidation (M)          | Ctrl      | 6              |
| 633.3  | 1264.6 | 2            | 64.4          | GWAGTGIMTTR                      | 45 - 56               | Oxidation (M)          | CKI-α     | 8              |
| 631.3  | 1260.6 | 2            | 74.9          | CPCGANISGNVR                     | 57 - 68               | Propionamide (C)       | Ctrl      | 1              |
| 631.3  | 1260.6 | 2            | 55.5          | CPCGANISGNVR                     | 57 - 68               | Propionamide (C)       | CKI-α     | 1              |
| 631.3  | 1260.6 | 2            | 72.7          | CPCGANISGNVR                     | 57 - 68               | Propionamide (C)       | Ctrl      | 2              |
| 631.3  | 1260.6 | 2            | 61.2          | CPCGANISGNVR                     | 57 - 68               | Propionamide (C)       | CKI-α     | 2              |
| 625.3  | 1248.6 | 2            | 75.5          | GWAGTGIMTTR                      | 45 - 56               |                        | Ctrl      | 71             |
| 625.3  | 1248.6 | 2            | 69.6          | GWAGTGIMTTR                      | 45 - 56               |                        | CKI-α     | 42             |
| 604.3  | 1206.7 | 2            | 27.3          | FAPTPKPFRR                       | 161 - 170             |                        | CKI-α     | 2              |
| 601.8  | 1201.7 | 2            | 45.3          | LPGLPFISQCK                      | 31 - 41               |                        | Ctrl      | 6              |
| 601.8  | 1201.7 | 2            | 51.6          | LPGLPFISQCK                      | 31 - 41               |                        | CKI-α     | 5              |
| 595.8  | 1189.5 | 2            | 79.8          | CPCGANISGNVR                     | 57 - 68               |                        | Ctrl      | 9              |
| 595.8  | 1189.5 | 2            | 74.6          | CPCGANISGNVR                     | 57 - 68               |                        | CKI-α     | 11             |
| 550.3  | 1098.6 | 2            | 39.7          | KAPTTPRRR                        | 345 - 353             | Phosphorylation (S/T)  | Ctrl      | 10             |
| 550.3  | 1098.6 | 2            | 33.6          | KAPTTPRRR                        | 345 - 353             | Phosphorylation (S/T)  | CKI-α     | 8              |
| 510.3  | 1018.6 | 2            | 40.4          | KAPTTPRRR                        | 345 - 353             |                        | Ctrl      | 9              |
| 510.3  | 1018.6 | 2            | 28.8          | KAPTTPRRR                        | 345 - 353             |                        | CKI-α     | 4              |
| 472.2  | 942.5  | 2            | 45.1          | KAPTTPRRR                        | 345 - 352             | Phosphorylation (S/T)  | Ctrl      | 6              |
| 472.2  | 942.5  | 2            | 30.7          | KAPTTPRRR                        | 345 - 352             | Phosphorylation (S/T)  | CKI-α     | 6              |
| 446.3  | 890.5  | 2            | 31.4          | APTTPRRR                         | 346 - 353             |                        | CKI-α     | 1              |
| 432.3  | 862.5  | 2            | 35.3          | KAPTTPRRR                        | 345 - 352             |                        | Ctrl      | 3              |
| 432.3  | 862.5  | 2            | 35.3          | KAPTTPRRR                        | 345 - 352             |                        | CKI-α     | 2              |
| 374.7  | 747.4  | 2            | 25.8          | NWLTSK                           | 21 - 26               |                        | CKI-α     | 1              |
| 353.2  | 704.4  | 2            | 36.0          | SGSWLR                           | 1 - 6                 |                        | Ctrl      | 2              |
| 353.2  | 704.4  | 2            | 43.0          | SGSWLR                           | 1 - 6                 |                        | CKI-α     | 2              |
| Total  |        |              |               |                                  |                       |                        |           | 629            |

**SUPPLEMENTAL TABLE S3. NS5A Peptides Identified by LC-MS/MS**

**Footnotes.** *m/z*: mass-to-charge ratio; Mass: molecular weight of a peptide; Charge State: number of charges of peptide ions; Peptide Score: parameter for peptide selection, and a minimum peptide score of 25 is used in this study; No. of Peptide: number of peptides identified. Peptides #1, #2, and #3 are highlighted in green, blue, and yellow, respectively. Phosphopeptides are indicated in bold red letters. Modified amino acids are underlined.
